# Supplementary material for: Regulation of Ni/Al2O3 catalysts by metal deposition procedures for selective hydrogenation of adiponitrile
Source: Royal Society of Chemistry journal article supplement (doi:10.1039/d1nj04776k), 2021-12-01
Supplement: d1nj04776k1.pdf [file d1nj04776k1.pdf]

## Supporting information of

### Regulation of Ni/Al<sub>2</sub>O<sub>3</sub> catalysts by metal deposition procedures for selective hydrogenation of adiponitrile

Qi Zhao, Wenhao Yang, Jingjie Luo, Changhai Liang\*

Laboratory of Advanced Materials & Catalytic Engineering (AMCE), School of Chemical Engineering, Dalian University of Technology, Panjin 124221, China

\*Corresponding author. Tel/Fax: +86-411-84986353; E-mail: [changhai@dlut.edu.cn](mailto:changhai@dlut.edu.cn)

**Figure S1.** Typical TEM image (a) and HAADF-STEM elemental line scan (b) of Ni/Al<sub>2</sub>O<sub>3</sub>-NH.

**Figure S2.** TEM image (a) and HAADF-STEM elemental mappings (b) of Ni/Al<sub>2</sub>O<sub>3</sub>-U.

**Figure S3.** Typical TEM and HR-TEM images of Ni/Al<sub>2</sub>O<sub>3</sub>-U sample.

**Figure S4.** A typical example of the original deconvolution method of the H<sub>2</sub>-TPD curve via the Ni/Al<sub>2</sub>O<sub>3</sub>-OH catalyst.

**Figure S5.** NH<sub>3</sub>-TPD curves of different Ni/Al<sub>2</sub>O<sub>3</sub> catalysts.

**Figure S6.** NH<sub>3</sub>-TPD curve of Al<sub>2</sub>O<sub>3</sub>.

**Figure S7.** Influences of catalyst amount (a) and ADN/Ni molar ratio (b) on the catalytic performances by Ni/Al<sub>2</sub>O<sub>3</sub>-OH catalyst. Reaction conditions: 7.0 MPa H<sub>2</sub>, 90 °C for 3 h in 25 mL ethanol, 2.5 g ADN for (a) and 500 mg catalyst used for (b).

**Figure S8.** Circular test of the Ni/Al<sub>2</sub>O<sub>3</sub> sample. Reaction conditions: 7.0 MPa H<sub>2</sub>, 80 °C for 3 h in 25 mL ethanol, molar ratio of ADN/Ni=13.6.

**Figure S9.** Typical TEM images of Ni/Al<sub>2</sub>O<sub>3</sub>-OH sample after reaction.

**Figure S10.** The external diffusion during the hydrogenation reaction by Ni/Al<sub>2</sub>O<sub>3</sub>-OH catalyst.

**Figure S11.** Linear relationship between (a)  $c_{\text{ADN}}$  and reaction time according to zero-order reaction kinetics, and (b)  $\ln c_{\text{ADN}}$  and reaction time according to first-order

reaction kinetics by Ni/Al<sub>2</sub>O<sub>3</sub>-OH over a temperature range of 80-120 °C, 7.0 MPa H<sub>2</sub>, 800 rpm for 1.5 h, molar ratio of ADN/Ni=200.

**Figure S12.** Linear relationship between  $\ln r_A$  and  $\ln P_{H_2}$  at 90 °C of the ADN hydrogenation by Ni/Al<sub>2</sub>O<sub>3</sub>-OH

**Figure S13.** Catalytic performance by Ni/Al<sub>2</sub>O<sub>3</sub>-OH and Ni/Al<sub>2</sub>O<sub>3</sub>-U samples. Reaction conditions: 7.0 MPa H<sub>2</sub>, 90 °C for 3 h in 25 mL ethanol, molar ratio of ADN/Ni=13.6.

**Table S1.** The R<sup>2</sup> for mathematics fitting of kinetic reaction models during the ADN hydrogenation by Ni/Al<sub>2</sub>O<sub>3</sub>-OH catalysts.<sup>a</sup>

**Table S2.** The reaction rate ( $r_A$ ) and activation energy ( $E_a$ ) for the hydrogenation of ADN by different Ni/Al<sub>2</sub>O<sub>3</sub> catalysts.<sup>a</sup>

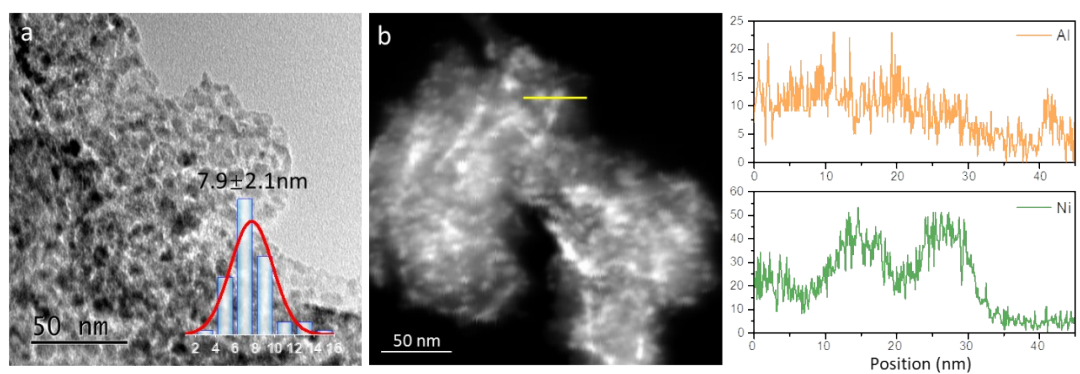

**Figure S1.** Typical TEM image (a) and HAADF-STEM elemental line scan (b) of Ni/Al<sub>2</sub>O<sub>3</sub>-NH.

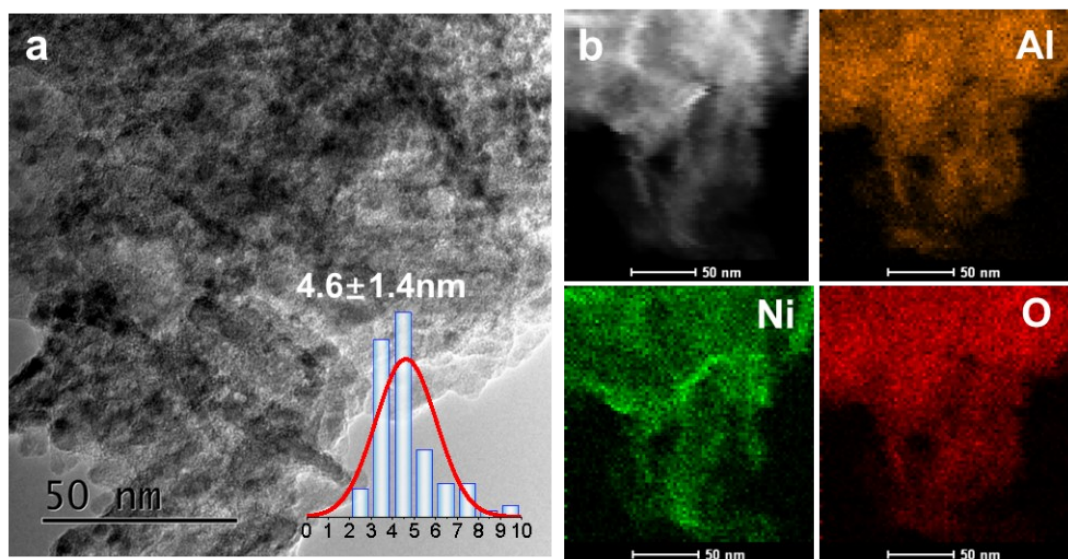

**Figure S2.** TEM image (a) and HAADF-STEM elemental mappings (b) of Ni/Al<sub>2</sub>O<sub>3</sub>-U.

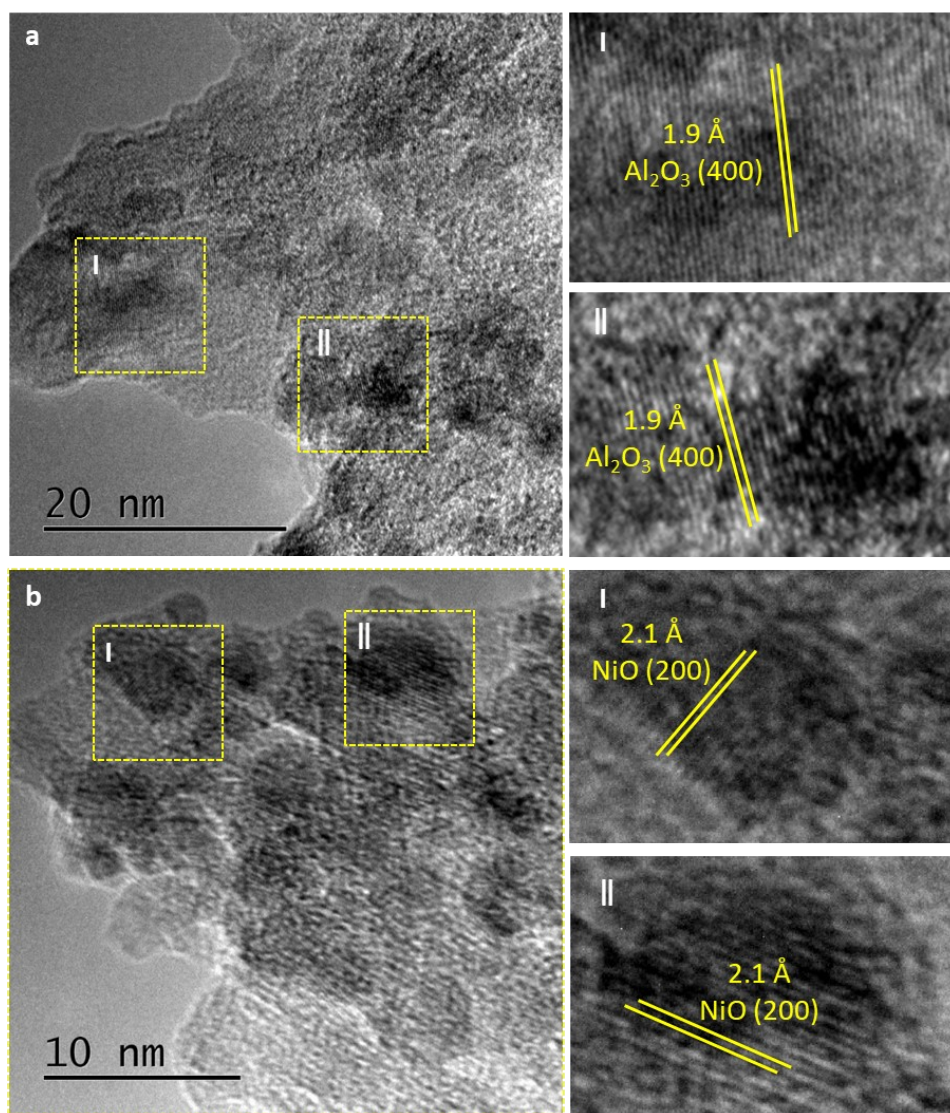

**Figure S3.** Typical TEM and HR-TEM images of Ni/Al<sub>2</sub>O<sub>3</sub>-U sample.

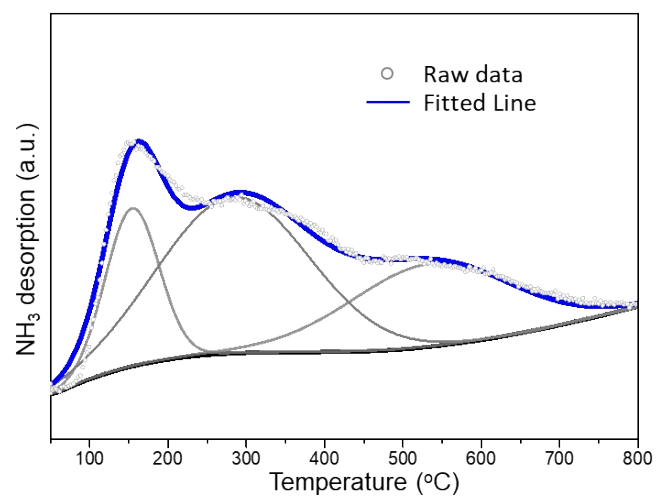

**Figure S4.** A typical example of the original deconvolution method of the H<sub>2</sub>-TPD curve for the Ni/Al<sub>2</sub>O<sub>3</sub>-OH catalyst.

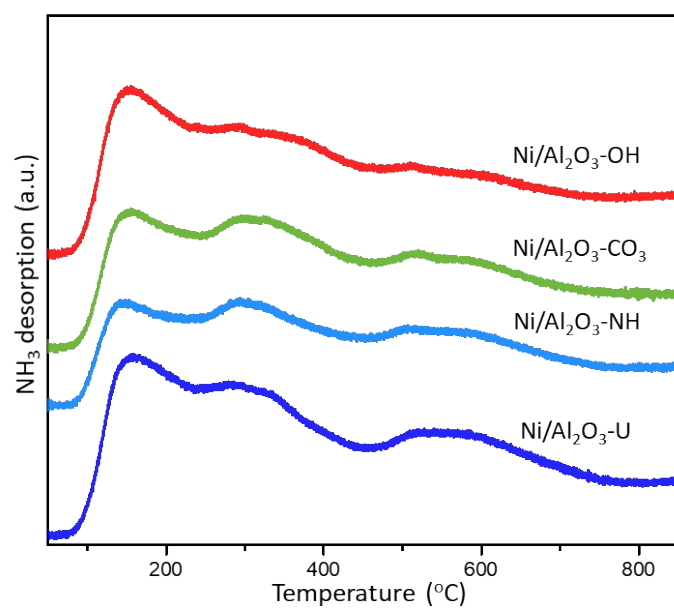

**Figure S5.** NH<sub>3</sub>-TPD curves of different Ni/Al<sub>2</sub>O<sub>3</sub> catalysts.

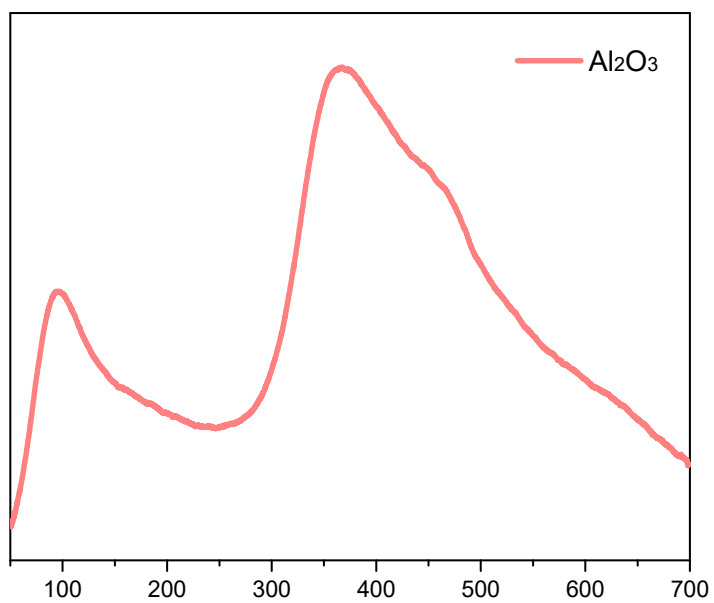

**Figure S6.**  $\text{NH}_3$ -TPD curve of  $\text{Al}_2\text{O}_3$ .

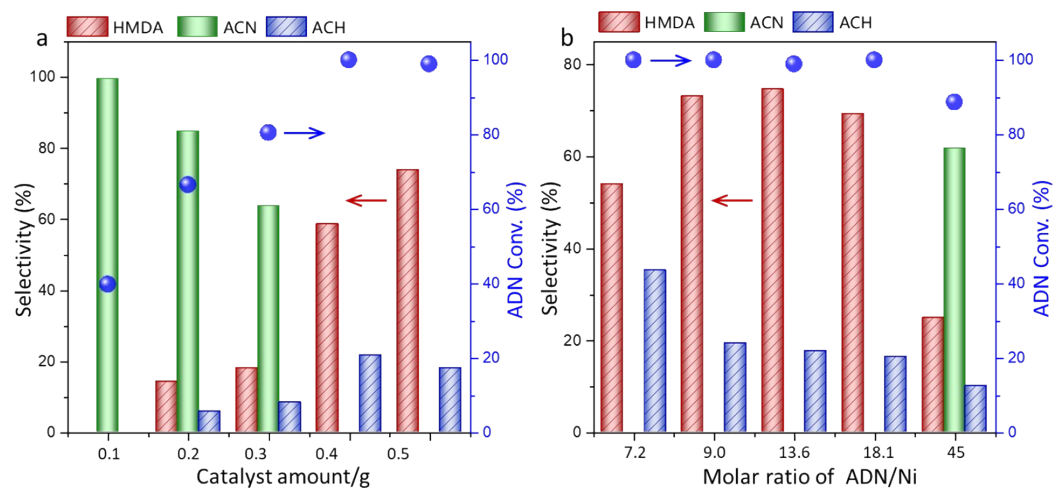

**Figure S7.** Influences of catalyst amount (a) and ADN/Ni molar ratio (b) on the catalytic performances by Ni/Al<sub>2</sub>O<sub>3</sub>-OH catalyst. Reaction conditions: 7.0 MPa H<sub>2</sub>, 90 °C for 3 h in 25 mL ethanol, 2.5 g ADN for (a) and 500 mg catalyst used for (b).

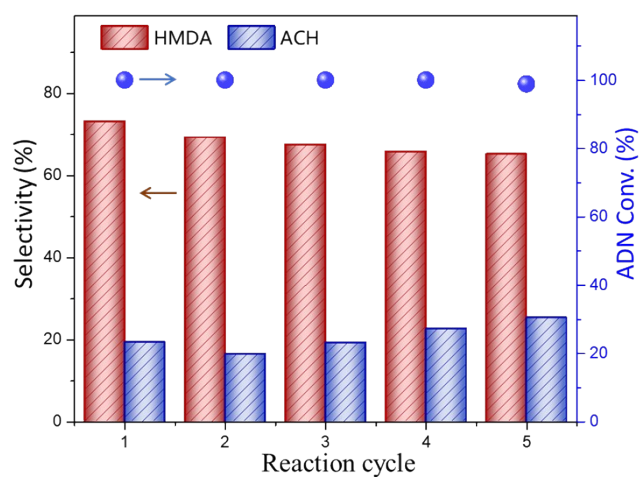

**Figure S8.** Circular test of the Ni/Al<sub>2</sub>O<sub>3</sub> sample. Reaction conditions: 7.0 MPa H<sub>2</sub>, 80 °C for 3 h in 25 mL ethanol, molar ratio of ADN/Ni=13.6.

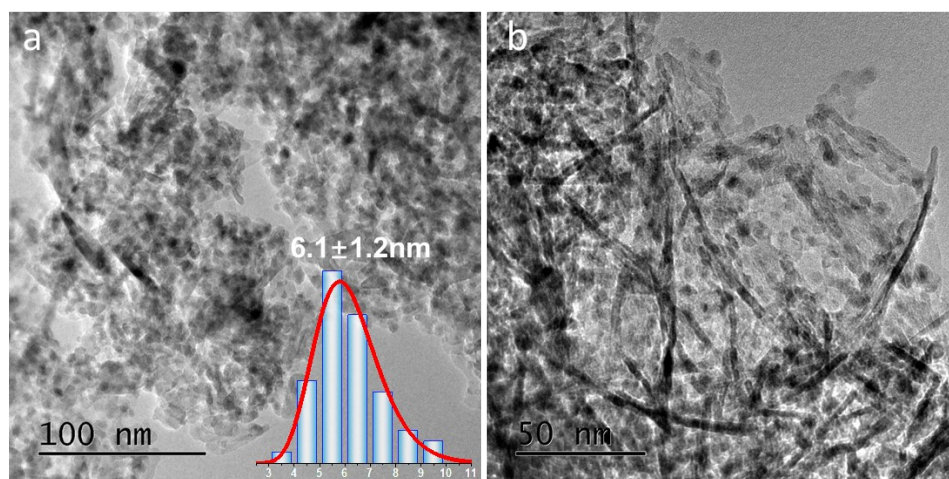

**Figure S9.** Typical TEM images of Ni/Al<sub>2</sub>O<sub>3</sub>-OH sample after reaction.

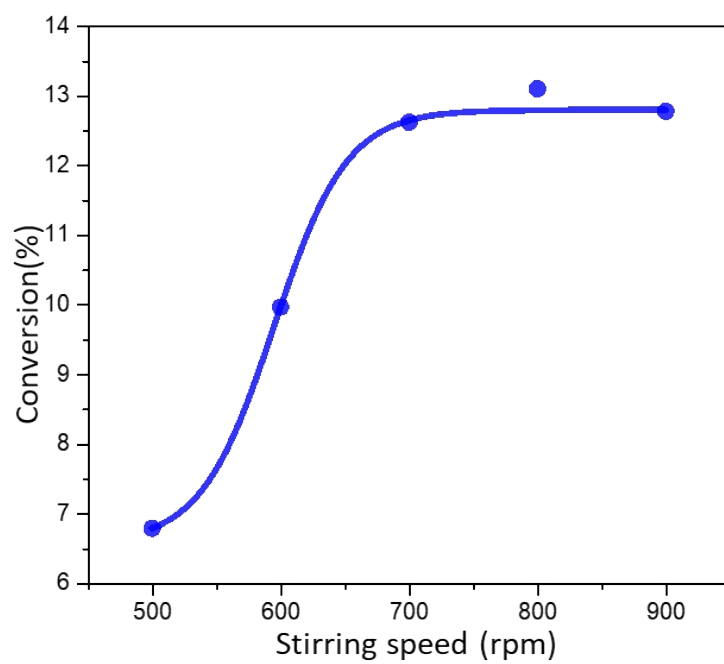

**Figure S10.** The external diffusion during the hydrogenation reaction by Ni/Al<sub>2</sub>O<sub>3</sub>-OH catalyst.

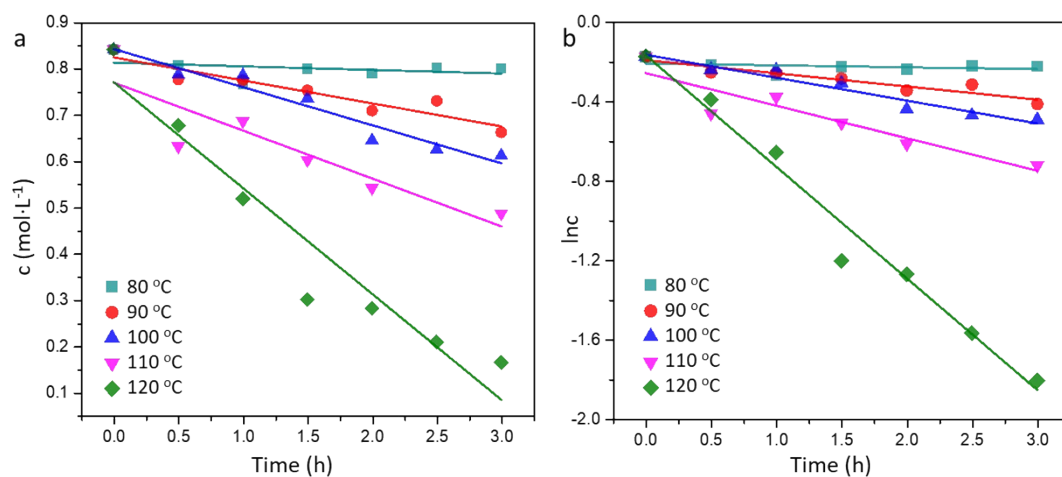

**Figure S11.** Linear relationship between (a)  $c_{\text{ADN}}$  and reaction time according to zero-order reaction kinetics, and (b)  $\ln c_{\text{ADN}}$  and reaction time according to first-order reaction kinetics by Ni/Al<sub>2</sub>O<sub>3</sub>-OH over a temperature range of 80-120 °C, 7.0 MPa H<sub>2</sub>, 800 rpm for 1.5 h, molar ratio of ADN/Ni=200.

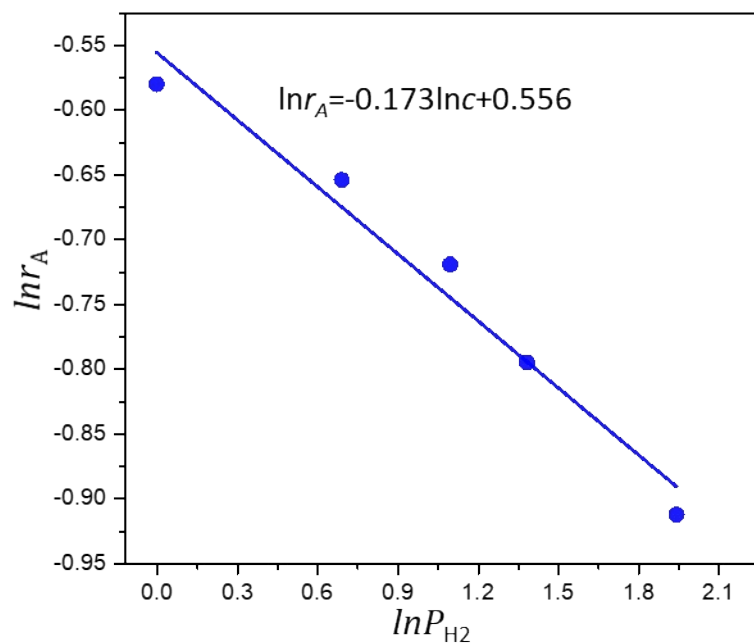

**Figure S12.** Linear relationship between  $\ln r_A$  and  $\ln P_{H_2}$  at 90 °C of the ADN hydrogenation by Ni/Al<sub>2</sub>O<sub>3</sub>-OH

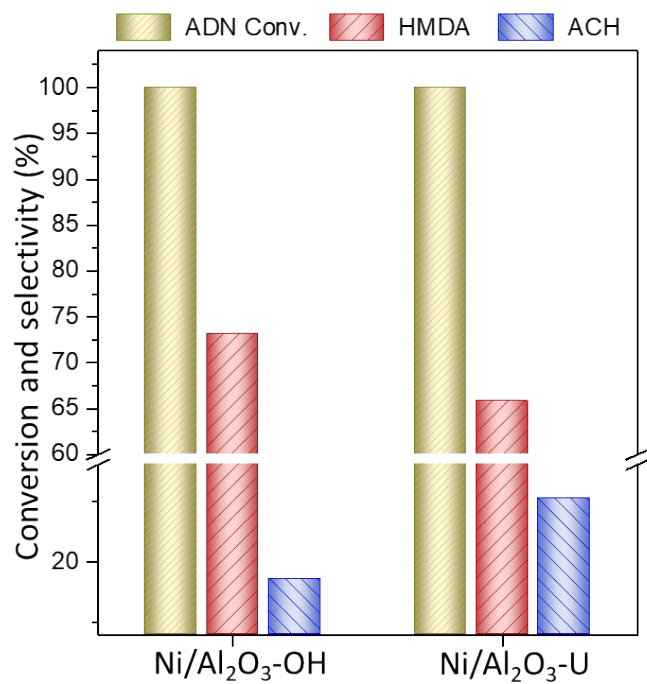

**Figure S13.** Catalytic performance by Ni/Al<sub>2</sub>O<sub>3</sub>-OH and Ni/Al<sub>2</sub>O<sub>3</sub>-U samples. Reaction conditions: 7.0 MPa H<sub>2</sub>, 90 °C for 3 h in 25 mL ethanol, molar ratio of ADN/Ni=13.6.

**Table S1.** The  $R^2$  for mathematics fitting of kinetic reaction models during the ADN hydrogenation by Ni/Al<sub>2</sub>O<sub>3</sub>-OH catalysts.<sup>a</sup>

| Ni/Al <sub>2</sub> O <sub>3</sub> -OH catalyst | 80 °C | 90 °C | 100 °C | 110 °C | 120 °C |
|------------------------------------------------|-------|-------|--------|--------|--------|
| Zero-order                                     | 0.38  | 0.94  | 0.97   | 0.90   | 0.96   |
| First-order                                    | 0.37  | 0.94  | 0.97   | 0.93   | 0.99   |
| Second-order                                   | 0.73  | 0.94  | 0.97   | 0.95   | 0.98   |

<sup>a</sup> Experiments carried out over a temperature range of 80-120 °C, 7.0 MPa H<sub>2</sub>, 800 rpm for 1.5 h, molar ratio of ADN/Ni=200.

**Table S2.** The reaction rate ( $r_A$ ) and activation energy ( $E_a$ ) for the hydrogenation of ADN by different Ni/Al<sub>2</sub>O<sub>3</sub> catalysts.<sup>a</sup>

| Catalyst                                           | Reaction rate (mol·L <sup>-1</sup> ·h <sup>-1</sup> ) |       |        |        |        | E <sub>a</sub> (kJ/mol) |
|----------------------------------------------------|-------------------------------------------------------|-------|--------|--------|--------|-------------------------|
|                                                    | 80 °C                                                 | 90 °C | 100 °C | 110 °C | 120 °C |                         |
| Ni/Al <sub>2</sub> O <sub>3</sub> -OH              | 0.047                                                 | 0.059 | 0.113  | 0.160  | 0.243  | 49.6                    |
| Ni/Al <sub>2</sub> O <sub>3</sub> -CO <sub>3</sub> | 0.021                                                 | -     | 0.036  | 0.116  | 0.164  | 62.6                    |
| Ni/Al <sub>2</sub> O <sub>3</sub> -NH              | 0.019                                                 | -     | 0.077  | 0.099  | 0.236  | 69.4                    |
| Ni/Al <sub>2</sub> O <sub>3</sub> -U               | 0.009                                                 | 0.018 | 0.041  | 0.048  | 0.119  | 72.0                    |

<sup>a</sup> Experiments carried out over a temperature range of 353–393 K, 7.0 MPa H<sub>2</sub>, 800 rpm for 1.5 h, molar ratio of ADN/Ni=200.
